## RESEARCH ARTICLE

# Physical activity and its correlates among school teachers in a semi-urban district of Nepal

Rajan Shrestha<sup>1,2\*</sup>, Durga Prasad Pahari<sup>1</sup>, Santoshi Adhikari<sup>3</sup>, Bijay Khatri<sup>4</sup>, Sangita Majhi<sup>4</sup>, Tara Ballav Adhikari<sup>2,5</sup>, Dinesh Neupane<sup>5,6</sup>, Per Kallestrup<sup>7</sup>, Abhinav Vaidya<sup>8</sup>

**1** Central Department of Public Health, Institute of Medicine, Tribhuvan University, Kathmandu, Nepal, **2** Department of Public Health, Aarhus University, Aarhus C, Denmark, **3** Ethical Review, Monitoring and Evaluation Section, Nepal Health Research Council, Kathmandu, Nepal, **4** Academic and Research Department, Hospital for Children Eye ENT and Rehabilitation Services, Bhaktapur, Nepal, **5** COBIN Project, Nepal Development Society, Chitwan, Nepal, **6** Johns Hopkins Bloomberg School of Public Health, Baltimore, MD, United States of America, **7** Center for Global Health, Department of Public Health, Aarhus University, Aarhus C, Denmark, **8** Department of Community Medicine, Kathmandu Medical College, Kathmandu, Nepal

\* [rajanshrestha011@gmail.com](mailto:rajanshrestha011@gmail.com)

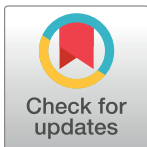

## Abstract

Regular physical activity (PA) is one of the effective strategies for mitigating non-communicable diseases, promoting healthy ageing, and preventing premature mortality. In South Asia, up to 34.0% of adults are insufficiently active, and up to 44.1% of adults in Nepal. We sought to assess self-reported PA status and its correlates among teachers in the semi-urban district of Nepal. A cross-sectional descriptive study was conducted among teachers at randomly selected public secondary schools in Bhaktapur, Nepal, from November 2018–April 2019. PA status was assessed in Metabolic Equivalent to task minutes per week using the International Physical Activity Questionnaire (IPAQ)—Long Form. Point estimates and odds ratios were calculated at a 95% confidence interval, and a p-value <0.05 was considered statistically significant. Among the 360 participants, the mean (SD) age was 40.3 (10.2) years, with 52.5% female participation. A low level of PA was seen among 11.9% (95% CI: 8.4–15.2) of teachers, and more than half (56.0%) of the activity was only moderate intensity. Domestic and garden work was the main contributor (43.0%) of total PA, while leisure time was the least (14.0%). Among the socio-demographic factors, only sex was significantly associated ( $p = 0.005$ ) with PA. Participants living in locations with walkable areas were 3.4 times (95% CI: 1.6–7.3) more likely to be engaged in moderate-to-high level PA than those without. In our study, the point prevalence of insufficient PA among teachers working at public secondary schools was higher than the national point prevalence. PA promotion programs targeting sedentary populations like school teachers should be developed to reduce the point prevalence of insufficient PA.

## OPEN ACCESS

**Citation:** Shrestha R, Pahari DP, Adhikari S, Khatri B, Majhi S, Adhikari TB, et al. (2023) Physical activity and its correlates among school teachers in a semi-urban district of Nepal. *PLOS Glob Public Health* 3(10): e0002000. <https://doi.org/10.1371/journal.pgph.0002000>

**Editor:** Zulkarnain Jaafar, Universiti Malaya, MALAYSIA

**Received:** December 27, 2022

**Accepted:** September 21, 2023

**Published:** October 23, 2023

**Copyright:** © 2023 Shrestha et al. This is an open access article distributed under the terms of the [Creative Commons Attribution License](https://creativecommons.org/licenses/by/4.0/), which permits unrestricted use, distribution, and reproduction in any medium, provided the original author and source are credited.

**Data Availability Statement:** The datasets used and/or analyzed during the current study are fully available as supporting documents.

**Funding:** The authors received no specific funding for this work.

**Competing interests:** The authors have declared that no competing interests exist.

## Introduction

Regular physical activity (PA) is one of the most effective strategies for reducing non-communicable diseases (NCDs) and biological risk factors like hypertension and obesity, increasing the quality of life and lifespan [1–4]. Physical inactivity is the fourth leading risk, contributing to 9% of global premature mortality with the increased prevalence of NCDs [5]. Adequate PA can help to prevent and manage NCDs, promote healthy ageing, and prevent premature death [6]. PA also has an interrelationship with the physical, mental, and social well-being of people [7].

World Health Organization (WHO) recommends at least 150–300 minutes weekly of moderate-intensity or at least 75–150 minutes weekly of vigorous-intensity PA for health benefits [3]. Globally, one in four adults have PA below this recommendation. (8) In South Asian countries, there are high variations in national level point prevalence of low-level PA [8], ranging from 7.3% in Bhutan to 41.3% in India, with Nepal having 7.4% [9–14]. The national point prevalence of physical inactivity was higher than in previous national surveys done in Nepal [11, 15, 16]. However, up to 44.1% of adults living in urban areas had insufficient PA. Most people with physical inactivity are job holders mainly involved in desk work and are not engaged in moderate or high-level PA [17–19]. Teachers also engage only in low-level PA and spend their working hours sitting, walking or standing, making them vulnerable groups for NCDs [17, 20]. There is a positive association between PA and teachers' perceived mental, physical and work-related health [21]. Teachers are considered the main facilitators, change agents and role models for PA promotion to school children and society [22–24]; however, their well-being and PA are rarely discussed globally, including in Nepal. [17, 25–28] Only few studies are available on PA among teachers globally, which reported a high point prevalence of physical inactivity [17, 18, 29].

Nepal has also endorsed a multisectoral action plan for the prevention and control of NCDs and set a 10% relative reduction target in the point prevalence of insufficient PA by 2025; however, the PA status of this vulnerable group, covering a large proportion of Nepal's population, is not yet available [30, 31]. Therefore, this study aimed to explore PA and its correlates among teachers at public secondary schools (grade 1–10) in Bhaktapur district, Nepal.

## Methods

### Ethics statement

Ethical approval was obtained from the Institutional Review Committee of Institute of Medicine, Tribhuvan University (Ref no. 45(6-11.E)2/075/076). Permission was obtained from municipalities and all the school administrations. Written informed consent was obtained from the participants before starting the interview and the participation in the study was voluntary.

**Study design and setting.** A descriptive cross-sectional study was conducted among teachers at public secondary schools in Bhaktapur, Nepal, from November 2018 to April 2019. Public secondary schools are government schools teaching basic level (grades 1–8) as well as secondary level education (grades 9–12), having larger number of teachers than in other schools. (30) Teachers on those schools are mostly middle-aged adults who spent many years on teaching in same school, as they are recruited after passing the Teacher Service Commission examination and are hired in permanent teaching positions at the same school until retirement. They are generally held in high regard and are respected in Nepali society. This respect for teachers is deeply rooted in the cultural and traditional values of the country [32, 33]. Bhaktapur is a district adjoining the capital city, Kathmandu. The district has urban and rural areas and is one of the rapidly urbanizing zones with the influx of people from all over Nepal. With rapid urbanization, the risk factors of NCDs and NCDs are major health issues in Nepal [30, 34].

**Study population and sampling.** The calculated sample size was 347 using the prevalence study formula  $(n) = Z^2 * p(1-p)/e^2 * 1.5$  and sample size correction formula as the number of teachers was fixed,  $n = n/(1+(n-1)/N)$ , where,  $z = 1.96$  at 95% confidence level,  $p = 0.46$  [18],  $e$  (allowable error) = 0.05,  $d$  (design effect) = 1.5, number of total teachers ( $N$ ) = 876, and adding of 5% non-response rate [35]. A sampling frame of all public secondary schools in purposively selected Bhaktapur district was prepared. Among the total of 43 public schools, each with 20 teachers on average, 18 schools ( $347/20 = 17.35 \cong 18$ ) were selected through cluster random sampling, and all teachers from the selected schools were included in the study (S2 Text). Teachers absent for two consecutive days of data collection were excluded from the study. There are no other exclusion criteria used for this study and no drop out in this study. Participants' enrollment is illustrated in Fig 1.

### Data collection and study tools

We assessed self-reported PA for this study and PA was measured in Metabolic Equivalent to Task (MET)-minutes per week using the International PA Questionnaire (IPAQ)–Long Form through face-to-face interviews. Four domain-specific (leisure time, domestic and garden, work-related, and transport-related), three activity-specific (walking, moderate-intensity, and vigorous-intensity), and total PA MET-minutes/week were calculated as per IPAQ scoring protocol [36]. Moderate level PA was defined as meeting at least three days of vigorous-intensity activity of at least 20 minutes per day or at least five days of moderate-intensity activity and walking of at least 30 minutes per day or at least five days of any combination of walking, moderate-intensity or vigorous-intensity activities achieving a minimum total PA of at least 600 MET-minutes/week. High-level PA was defined as teachers meeting vigorous-intensity activity on at least three days, achieving a minimum total PA of at least 1500 MET-minutes/week, or at least seven days of any combination of walking, moderate-intensity, or vigorous-intensity activities achieving a minimum total PA of at least 3000 MET-minutes/week. Teachers who failed to meet the moderate or high-level criteria were defined as low-level PA. Vigorous PAs take hard physical effort and make the person breathe much harder than usual. In contrast, moderate activities refer to activities that take moderate physical effort and make the person breathe somewhat harder than normal. Similarly, perceived walkable area is considered if the participants have a nearby place where they think they can go for a leisure walk. Other covariates included in this study were—sex, marital status, educational level, level of teaching, and years of teaching experience as socio-demographic variables. Environmental variables included were- availability of PA facilities at home and types (Agricultural land-Teachers having agricultural land are usually involved in ploughing, seeding, maintenance, and harvesting, which could contribute to total PA; kitchen garden, garden, livestock, bicycle, exercise equipment), perceived walkable area near the home, parks, or recreational facilities near home. All these environmental variables were recorded subjectively. Perceived friend's support, perceived family support, travel time to school, means of transportation, perception of the adequacy of PA, average sitting time, and screen time are also included, which were measured subjectively (S1 Text).

An automated digital blood pressure monitor (OMRON digital gadget) was used to measure blood pressure in the left arm using an adult-sized cuff. Participants were asked to rest for 15 minutes before taking the test, and the average of three systolic and diastolic blood pressure readings was used to calculate the participant's blood pressure. Height and weight were measured with a portable stadiometer equipped with a digital weighing scale, on a flat surface. Participants were requested to take off their shoes, headgear, and bulky apparel. Participants were instructed to face forward on the weighing scale, look straight ahead, and not tilt. Weight was

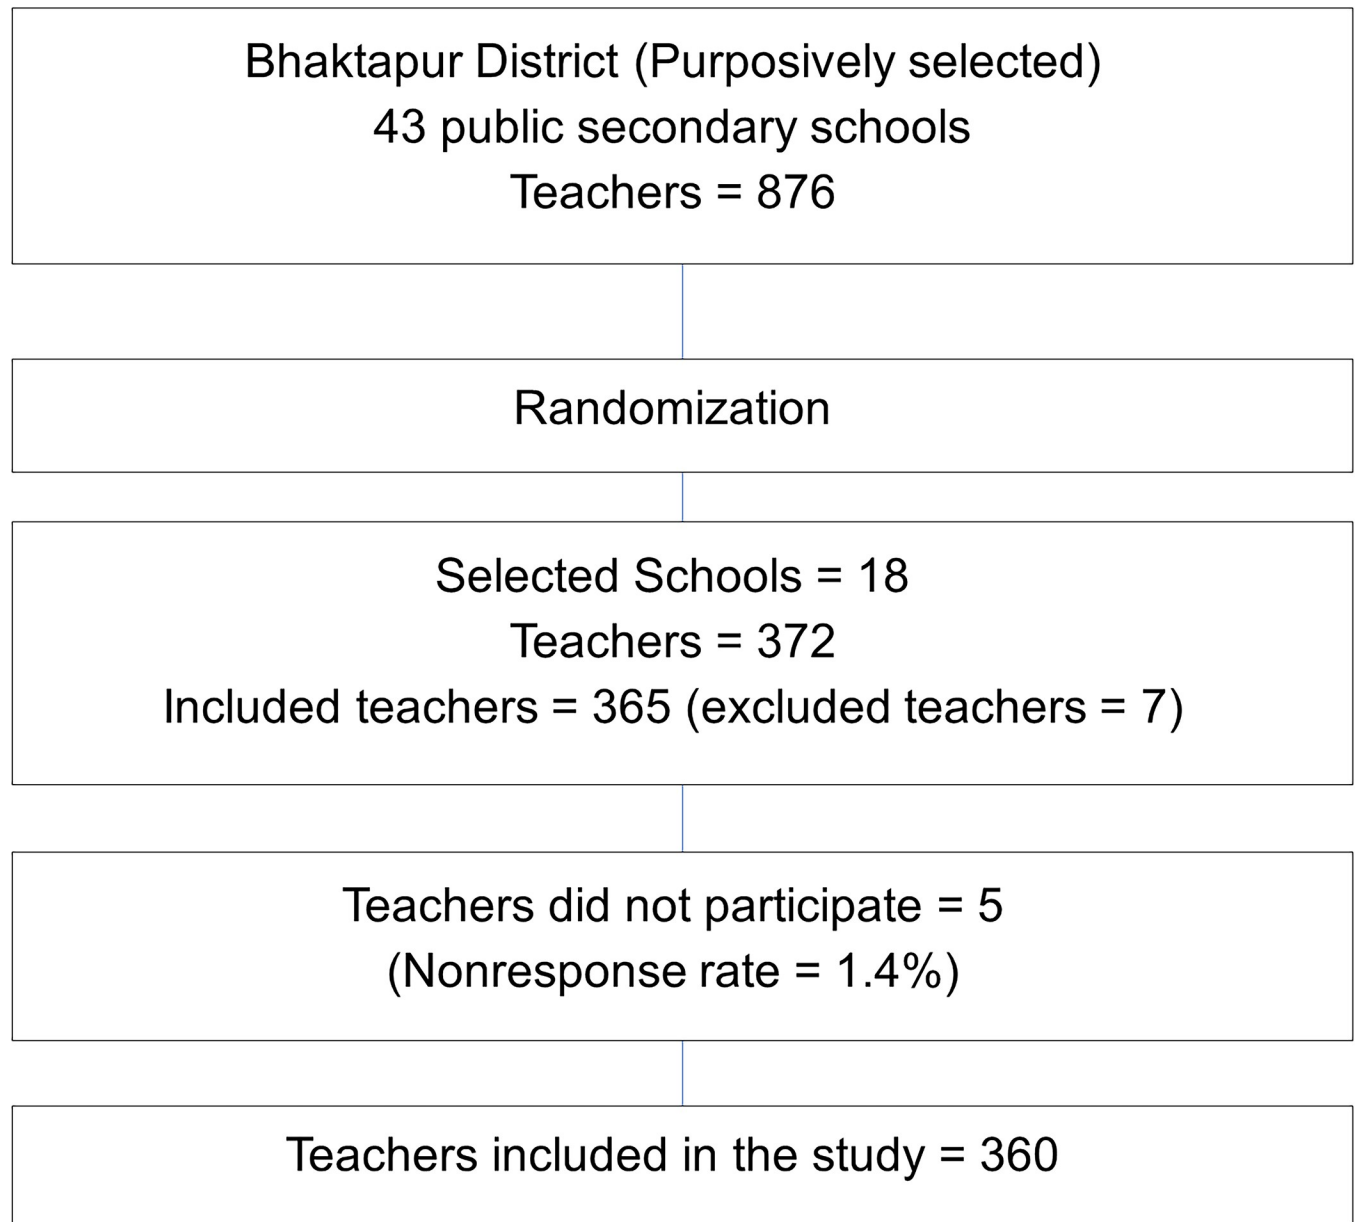

**Fig 1. Flow chart showing participant enrollment.**

<https://doi.org/10.1371/journal.pgph.0002000.g001>

measured in kilograms, and height was measured in centimeters. Constant tension tape was used to measure waist circumference. At the end of normal expiration, the waist circumference was measured in centimeters on the side of the midpoint between the lower margin of the palpable rib and the top of the iliac crest. BMI was calculated by dividing weight in kilograms by the square of height in meters. Similarly, waist to height ratio (WHtR) is calculated by dividing waist in centimeter by height in centimeter.

### Data management and statistical analysis

Each day, the collected data was checked for completeness, recording errors, and then edited manually on the same day of data collection. Data were entered in EpiData 3.1 data entry

format provided with checks to avoid errors in data entry. Data was further cleaned and categorized using MS Excel 365; analysis was done using IBM Statistical Package for Social Sciences (IBM SPSS) 26.0 version. Data were presented in numbers, percentages, mean, and standard deviation. Chi-square tests were performed to examine the differences between categorical variables. We used the logistic regression model to calculate the adjusted odds ratios for groups with low levels and with moderate-to-high level PA entering socio-demographic and enabling variables in the model. Variables with p values of <0.1 in chi-square test, were included in a multivariate logistic regression analysis. The odds ratio was estimated at a 95% confidence interval (CI). A p-value of <0.05 was considered significant.

## Results

### Socio-demographic characteristics

Three hundred sixty teachers aged 18 to 65 years participated in the study with a 1.5% nonresponse rate. The participants' mean (SD) age was 40.3 (10.2) years. More than half of the participants were female (52.5%). Most participants were involved in teaching basic-level students from grades 1–8 (61.1%). The mean (SD) years of teaching experience was 16.9 (10.2) years (Table 1).

### Environmental factors

Among the participants, 235 (65.3%) had facilities to be engaged in PA at home. Most of them had agricultural land (48.3%), while only a few had some exercise equipment (6.9%). Besides that, about 83.6% had nearby walkable areas where they could do morning or evening walks, while only 37.5% of participants had nearby recreational areas (Table 2).

### Physical activity

Among the participants, a low level of PA was found in 11.9% (95% CI: 8.6%–15.2%). While moderate and high-level PA was found in 81.4% (95% CI: 77.4%–85.4%) and 6.7% (95% CI: 4.1%–9.3%), respectively. WHO's global recommendation of PA was met by 90.3% (95% CI: 87.2%–93.4%) of participants (Table 3).

Mean (SD) of total MET-minutes/week was 3369.4 (2413.0). In terms of activity-specific PA, moderate activity (56.0%) is the most significant contributor to the total MET-minutes of PA accumulated by participants in a week, followed by walking (31.0%) and vigorous activity (13.0%). Home and garden work (43.0%) contributed a more significant proportion of the

**Table 1. Socio-demographic characteristics of the participants.**

| Characteristics              | n                              | %   | 95% CI |           |
|------------------------------|--------------------------------|-----|--------|-----------|
| Sex                          | Female                         | 189 | 52.5   | 47.3–57.7 |
|                              | Male                           | 171 | 47.5   | 42.3–52.7 |
| Marital status               | Married                        | 329 | 91.4   | 88.5–94.3 |
|                              | Single/never married           | 31  | 8.6    | 5.7–11.5  |
| Educational Level            | Higher secondary (Grade 10–12) | 75  | 20.9   | 16.7–25.1 |
|                              | University-Bachelor            | 137 | 38.1   | 33.2–43.2 |
|                              | University-Master and above    | 147 | 41.0   | 35.9–46.1 |
| Level of teaching            | Basic (Grade 1–8)              | 220 | 61.1   | 56.1–66.1 |
|                              | Secondary (Grade 9–10)         | 140 | 38.9   | 33.9–43.9 |
| Years of teaching experience | Up to 10 years                 | 128 | 35.5   | 30.6–40.4 |
|                              | 16–20 years                    | 92  | 25.5   | 21.0–30.0 |
|                              | 20 + years                     | 140 | 38.9   | 33.9–43.9 |

<https://doi.org/10.1371/journal.pgph.0002000.t001>

**Table 2. Characteristics of the participants.**

| Characteristics                                            |                           | n   | %    | 95% CI    |
|------------------------------------------------------------|---------------------------|-----|------|-----------|
| Home PA Facilities                                         | Yes                       | 235 | 65.3 | 60.4–70.2 |
| Types of available home PA facilities (Multiple responses) | Agriculture               | 174 | 48.3 | 43.1–53.5 |
|                                                            | Kitchen garden            | 137 | 38.1 | 33.1–43.1 |
|                                                            | Garden                    | 68  | 18.9 | 14.9–22.9 |
|                                                            | Livestock                 | 53  | 14.7 | 11.0–18.4 |
|                                                            | Bicycle                   | 40  | 11.1 | 7.9–14.3  |
|                                                            | Exercise equipment        | 25  | 6.9  | 4.3–9.5   |
| Walkable area near the home                                | Yes                       | 301 | 83.6 | 79.8–87.4 |
| Parks or recreational facility near home                   | Yes                       | 135 | 37.5 | 32.5–42.5 |
| Travel time to school                                      | Up to 30 min              | 266 | 73.9 | 69.4–78.4 |
|                                                            | 31–60 min                 | 69  | 19.2 | 15.1–23.3 |
|                                                            | 60+ min                   | 25  | 6.9  | 4.3–9.5   |
| Transportation                                             | Walking                   | 131 | 36.5 | 31.4–41.4 |
|                                                            | Motorcycle                | 130 | 36.2 | 31.1–41.1 |
|                                                            | Bus                       | 95  | 26.5 | 21.8–31   |
|                                                            | Bicycle                   | 3   | 0.8  | -0.1–1.7  |
| Perceived family support                                   | Yes                       | 352 | 97.8 | 96.3–99.3 |
| Perceived friends support                                  | Yes                       | 350 | 97.2 | 95.5–98.9 |
| Average sitting time per day (minute)                      | below 158.7               | 199 | 55.4 | 50.2–60.4 |
|                                                            | 158.7 and above           | 160 | 44.6 | 39.3–49.5 |
| Screen time                                                | Up to 2 hours             | 210 | 58.3 | 53.2–63.4 |
|                                                            | More than 2 hours         | 150 | 41.7 | 36.6–46.8 |
| Blood Pressure                                             | SBP < 140 and/or DBP < 90 | 294 | 81.7 | 77.7–85.7 |
|                                                            | SBP ≥ 140 and/or DBP ≥ 90 | 66  | 18.3 | 14.3–22.3 |
| Body Mass Index                                            | < 30                      | 312 | 86.7 | 83.2–90.2 |
|                                                            | ≥ 30                      | 48  | 13.3 | 9.8–16.8  |
| Waist to Height Ratio                                      | < 0.6                     | 191 | 53.1 | 47.9–58.3 |
|                                                            | ≥ 0.6                     | 169 | 46.9 | 41.7–52.1 |

Mean (SD) screen time = 2.37 (1.78) hours; Mean (SD) sitting time = 158.74 (88.13) Minutes

<https://doi.org/10.1371/journal.pgph.0002000.t002>

total MET-minutes/week of the participants, whereas leisure-time activity contributed only 14.0%. Work (21.0%) and Transport (20.0%) domains contributed almost equally to the proportion of the total MET-minutes/week of PA gained by teachers (Table 4).

### Univariate comparison of active and inactive study participants

Among the socio-demographic factors, only sex was significantly associated ( $p = 0.005$ ) with PA. Similarly, the availability of walkable areas in the neighborhood ( $p = 0.009$ ), using bicycles

**Table 3. Level of PA.**

| Characteristics                         | n   | Percentage (95% CI) |
|-----------------------------------------|-----|---------------------|
| <b>IPAQ Classification</b>              |     |                     |
| Low PA                                  | 43  | 11.9 (8.4–15.2)     |
| Moderate PA                             | 293 | 81.4 (77.4–85.4)    |
| High PA                                 | 24  | 6.7 (4.1–9.3)       |
| Meeting WHO global recommendation on PA | 325 | 90.3 (87.2–93.4)    |

<https://doi.org/10.1371/journal.pgph.0002000.t003>

**Table 4. Activity and domain-specific PA composition (n = 360).**

|                          | Total (%) | Median MET—minutes/week | Interquartile range |
|--------------------------|-----------|-------------------------|---------------------|
| <b>Total PA Score</b>    |           | 2,979.0                 | 3,309.0             |
| <b>Activity Specific</b> |           |                         |                     |
| Walking                  | 31.0      | 792.0                   | 1,266.4             |
| Moderate intensity       | 56.0      | 1,452.0                 | 2,486.2             |
| Vigorous intensity       | 13.0      | 0                       | 0                   |
| <b>Domain-Specific</b>   |           |                         |                     |
| Work                     | 21.0      | 0                       | 720.0               |
| Transport                | 22.0      | 462.0                   | 1,101.8             |
| Domestic and garden      | 43.0      | 1,080.0                 | 2,263.0             |
| Leisure time             | 14.0      | 198.0                   | 693.0               |

<https://doi.org/10.1371/journal.pgph.0002000.t004>

or walking to reach the school ( $p = 0.019$ , Cramer's  $V = 0.124$ ), and having any facility at home to be physically active ( $p = 0.002$ ) had a significant association with engaging in moderate to high-level PA (Table 5).

Teachers who had a walkable area near their home were about three times more likely to be engaged in moderate to a high level of PA (AOR = 3.4, 95% CI = 1.6–7.3) than those who did not have one. Similarly, teachers who had facilities for being physically active at their homes were about 2.9 times more likely to be engaged in moderate to high-level PA (AOR 2.9, 95% CI = 1.5–5.8) than those who did not have any. Being female and perception of adequate PA are also significantly associated with PA (Table 6).

## Discussion

The present study showed a high proportion (90.3%) of participants meeting WHO-recommended PA for health benefits. More than one in ten (11.9%) teachers working at public secondary schools of Bhaktapur have a low level of PA which is higher than the national point prevalence (7.4%) reported in the WHO STEPS survey 2019 [11]. The district included in our study is in Kathmandu Valley, the most developed valley and neighboring the capital city of Nepal, which may be a possible reason for the higher point prevalence of low-level PA than observed in data representing the whole country.

The point prevalence of low-level PA reported in our study is far below the findings from almost all other available literature. In our study, the point prevalence of low-level PA is less than half the point prevalence among general adults (27.5% in 2016 and 31.1% in 2012) globally [37, 38]. The point prevalence is also way below the point prevalence of low-level PA among general population reported from a similar area of the same district (43.4%).(35) Similarly, our finding is lower than neighboring country India's national point prevalence (41.4%) of low-level PA.(36) We used the IPAQ to assess PA, which evaluates a week's PA prior to the day of data collection. In contrast, those studies used the Global Physical Activity Questionnaire (GPAQ), which evaluates the average PA performed in a typical week. In addition, another possible reason for the difference in point prevalence may be due to the difference in the study population. Another multi-country study found that regular engagement in moderate PA among the general population was highest for Nepal (69.7%), than India (57.6%), Sri Lanka (49.7%), and Bangladesh (37.4%) [39]. However, these studies are not directly comparable, since they used World Health Survey data where the PA assessment is not based on Metabolic Equivalent to Task.

We used IPAQ because it has a well understandable comprehensive analysis plan and allows us to calculate PA categories—low, moderate and high PA; domain-specific—walking,

Table 5. Socio-demographic factors and level of PA.

|                                   | Characteristics           | PA Level               |           | P-value |
|-----------------------------------|---------------------------|------------------------|-----------|---------|
|                                   |                           | Moderate to High n (%) | Low n (%) |         |
| All                               |                           | 317 (88.1)             | 43 (11.9) |         |
| Sex                               | Female                    | 175 (92.6)             | 14 (7.4)  | 0.005   |
|                                   | Male                      | 142 (83.0)             | 29 (17.0) |         |
| Age                               | 15–29                     | 57 (90.5)              | 6 (9.5)   | 0.400   |
|                                   | 30–44                     | 128 (85.3)             | 22 (14.7) |         |
|                                   | 45–65                     | 132 (89.8)             | 15 (10.2) |         |
| Educational level                 | Up to bachelor            | 189 (89.2)             | 23 (10.8) | 0.429   |
|                                   | Master and above          | 127 (86.4)             | 20 (13.6) |         |
| Teaching years                    | Up to 10 years            | 112 (87.5)             | 16 (12.5) | 0.931   |
|                                   | 11–20 years               | 82 (89.1)              | 10 (10.9) |         |
|                                   | 20+ years                 | 123 (87.9)             | 17 (12.1) |         |
| Marital status                    | Married                   | 280 (88.3)             | 37 (11.7) | 0.665   |
|                                   | Unmarried                 | 37 (86.0)              | 6 (14.0)  |         |
| Teaching level                    | Basic level               | 192 (87.3)             | 28 (12.7) | 0.566   |
|                                   | Secondary level           | 125 (89.3)             | 15 (10.7) |         |
| Neighborhood walkable area        | Yes                       | 271 (90.0)             | 30 (10.0) | 0.009   |
|                                   | No                        | 46 (78.0)              | 13 (22.0) |         |
| Mode of Transportation            | Walking/ Bicycle          | 125 (93.3)             | 9 (6.7)   | 0.019   |
|                                   | Bus/ Motorbike            | 192 (85.0)             | 34 (15.0) |         |
| Availability of recreational park | Yes                       | 109 (86.5)             | 17 (13.5) | 0.506   |
|                                   | No                        | 208 (88.9)             | 26 (11.1) |         |
| Neighborhood PA facilities        | Yes                       | 114 (84.4)             | 21 (15.6) | 0.102   |
|                                   | No                        | 203 (90.2)             | 22 (9.8)  |         |
| Home PA facilities                | Yes                       | 216 (91.9)             | 19 (8.1)  | 0.002   |
|                                   | No                        | 101 (80.8)             | 24 (19.2) |         |
| Home to school travel time        | ≤ 30 mins                 | 229 (86.1)             | 37 (13.9) | 0.053   |
|                                   | >30 mins                  | 88 (93.6)              | 6 (6.4)   |         |
| Family support                    | Yes                       | 311 (88.4)             | 41 (11.6) | 1.000 # |
|                                   | No                        | 6 (85.7)               | 1 (14.3)  |         |
| Friends support                   | Yes                       | 8 (80.0)               | 2 (20.0)  | 0.763 # |
|                                   | No                        | 309 (88.3)             | 41 (11.7) |         |
| Blood Pressure                    | SBP < 140 and/or DBP < 90 | 262 (89.1)             | 32 (10.9) | 0.191   |
|                                   | SBP ≥ 140 and/or DBP ≥ 90 | 55 (83.3)              | 11 (16.7) |         |
| Body Mass Index                   | < 30                      | 277 (88.8)             | 35 (11.2) | 0.279   |
|                                   | ≥ 30                      | 40 (83.3)              | 8 (16.7)  |         |
| Waist to Height Ratio             | < 0.6                     | 172 (90.1)             | 19 (9.9)  | 0.214   |
|                                   | ≥ 0.6                     | 145 (85.8)             | 24 (14.2) |         |

# Fisher's exact test value, and others are chi-square test value

<https://doi.org/10.1371/journal.pgph.0002000.t005>

moderate and vigorous intensity; and domain-specific -work, transport, domestic and garden and leisure time; which is not available in GPAQ, besides the WHO recommendation used as cut off.(32) [40] This tool is comprehensive and reduces recall bias as it is based on activities performed in the last seven days rather than an activity performed in a typical week, as well as questions that are understandable to the participants [41].

The point prevalence of low-level PA reported in our study is far below than activity level of teachers in urban south India (46.5%) [17]. This study only assessed 24 hours PA levels and



Table 6. Correlates of engagement in moderate to vigorous PA.

|                                                              | Characteristics         | Adjusted OR* (95% CI) | P-value | Pseudo R Square <sup>#</sup> |
|--------------------------------------------------------------|-------------------------|-----------------------|---------|------------------------------|
| Sex (Ref: Male)                                              | Female                  | 2.8 (1.4–5.5)         | 0.004   |                              |
| Age                                                          |                         | 1.0 (0.9–1.0)         | 0.310   | 0.047                        |
| Availability of walkable area near the home                  | Yes                     | 3.4 (1.6–7.3)         | 0.002   | 0.093                        |
| Means of transportation (Ref: bike/bus)                      | walking/ cycle          | 2.1 (0.9–4.6)         | 0.058   | 0.068                        |
| Availability of PA facility at home                          | Yes                     | 2.9 (1.5–5.8)         | 0.001   | 0.102                        |
| Blood pressure level (Ref: SBP $\geq$ 140 and DBP $\geq$ 90) | SBP<140 and/or DBP < 90 | 1.5 (0.7–3.4)         | 0.293   | 0.053                        |
| Perception of the adequacy of PA                             | Yes                     | 2.5 (1.2–5.4)         | 0.013   | 0.082                        |
| Travel time to school (Ref: $\leq$ 30 mins)                  | >30 mins                | 2.0 (0.8–5.1)         | 0.124   | 0.061                        |
| Body Mass Index (Ref: $\geq$ 30)                             | < 30                    | 1.9 (0.8–4.7)         | 0.131   | 0.058                        |
| Waist to Height Ratio (Ref: $\geq$ 0.6)                      | < 0.6                   | 1.9 (0.9–3.9)         | 0.054   | 0.067                        |

\* Adjusted for age and sex variables using binary logistic regression

<sup>#</sup> Nagelkerke R Square value

<https://doi.org/10.1371/journal.pgph.0002000.t006>

may missed the PA done on other days, which is covered in our study. There are no other comparable studies done in low- and middle-income countries. However, the point prevalence of insufficient PA is very less than the reported point prevalence in few available studies done in upper middle-income country and high-income-country [29, 42]. A study conducted among teachers at public secondary schools in Sao Paulo, Brazil, reported a higher point prevalence of low-level PA (46.3%) than this study [42]. Similarly, teachers in our study is very less inactive than Croatian teachers (24.0%) [29]. This might be due to the difference in development, high HDI, GDP, and lifestyle differences between these countries and Nepal. Sex is significantly associated with low-level PA in our study ( $P>0.05$ ) and the study done in Brazil ( $P>0.01$ ), but the proportion was different. In our study, the proportion of males and females with low-level PA was 17% and 7.4%, respectively, whereas 53.0% and 42.9% in the study done in Brazil [18]. Another study done among people with diabetes in Pokhara and Lalitpur metropolises using GPAQ also demonstrated a higher point prevalence of low-level PA (20.4%) than our study [43].

Our study showed a significant association between PA and factors like sex, walkable area near home, means of transportation, availability of PA facilities at home, perception of the adequacy of PA, and blood pressure level before adjustment, while having PA facilities at home and having a walkable area near home were only significant after adjustment. Moderate to high PA was higher in females than males, which contrasts with the study of PA in the world population, as well as Croatian, South Indian and Brazilian teachers, where females are more inactive than men [17, 18, 38, 42]. This may be because females have to do household chores solely, even when they are engaged in jobs, which is not the same for males in the Nepalese society. Even though, leisure time PA is associated more with positive perceived wellbeing, it is found to be the least contributor of PA among teachers in our study, which is also consistent with the findings among Brazilian teachers, as well as civil servants and general population in Nepal [19, 42, 44]. Availability of walkable areas near home was significantly associated with involvement in moderate to high levels of PA ( $p<0.05$ ), which is also supported by a study done among older adults in Australia [45]. This might be due to the 31% contribution by walking in total PA. Another factor significantly associated with a moderate to a high level of PA was the availability of PA facilities at home. This PA is also consistent with the findings of a study done among residents in San Diego, California [46], and another study done among students of San Diego State University, California [47].

The strength of our study lies in highlighting the burden of insufficient PA among sedentary populations like school teachers from low- and middle-income countries. However, this study has several limitations to report. PA is based on subjective assessment and may be influenced by self-reported miscalculations. The tool only assesses the PA done for a week, potentially missing the activities done before and after a week of data collection days or just done on those weeks that were not done normally. There could have been recall bias as the participants should recall different activities they had done in a week [48, 49].

## Conclusion

The study concludes that insufficient PA among school teachers is higher than the national point prevalence, with very less leisure time PA. Being female, the availability of walkable areas near homes and PA facilities in the neighborhood were enabling factors of PA. PA promotion programs targeting sedentary populations like school teachers should be developed to reduce the point prevalence of insufficient PA. Large-scale community-based cohort studies using objective measurements of PA should be carried out to find the actual status of PA.

## Supporting information

### S1 Checklist. STROBE statement.

(DOC)

### S1 Data. Full study dataset.

(CSV)

### S1 Text. Characteristics.

(DOCX)

### S2 Text. Sample size calculation.

(DOCX)

## Acknowledgments

We would like to thank the Central Department of Public Health, Institute of Medicine for supporting to conduct this study. We also want to thank all Changunarayan, Bhaktapur, Madhyapur, Thimi, Suryabinayak municipalities, and authorities of all schools for allowing data collection.

## Author Contributions

**Conceptualization:** Rajan Shrestha, Durga Prasad Pahari.

**Data curation:** Rajan Shrestha.

**Formal analysis:** Rajan Shrestha.

**Methodology:** Rajan Shrestha, Durga Prasad Pahari, Abhinav Vaidya.

**Project administration:** Rajan Shrestha.

**Supervision:** Rajan Shrestha.

**Writing – original draft:** Rajan Shrestha, Santoshi Adhikari.

**Writing – review & editing:** Rajan Shrestha, Santoshi Adhikari, Bijay Khatri, Sangita Majhi, Tara Ballav Adhikari, Dinesh Neupane, Per Kallestrup, Abhinav Vaidya.

## References

1. Hill JO, Stult J, Wyatt HR, Regensteiner JG. Physical activity in prevention and management of obesity and type-2 diabetes. Nestle Nutrition workshop series Clinical & performance programme. 2006; 11:183–91; discussion 91–6. <https://doi.org/10.1159/000094451> PMID: 16820740.
2. World Health Organization. Global action plan for the prevention and control of noncommunicable diseases 2013–2020. 2013.
3. World Health Organization. Physical Activity 2018. Available from: <http://www.who.int/ncds/prevention/physical-activity/introduction/en/>.
4. World Health Organization. Global recommendations on physical activity for health. 2010.
5. World Health Organization. Global health risks: mortality and burden of disease attributable to selected major risks. 2009 978 92 4 156387 1.
6. Centers for Disease Control and Prevention. Physical Activity 2015. Available from: <https://www.cdc.gov/physicalactivity/basics/index.htm>.
7. Thapa K, Bhandari PM, Neupane D, Bhochohibhoya S, Rajbhandari-Thapa J, Pathak RP. Physical activity and its correlates among higher secondary school students in an urban district of Nepal. BMC public health. 2019; 19(1):886. <https://doi.org/10.1186/s12889-019-7230-2> PMID: 31277633
8. Ranasinghe CD, Ranasinghe P, Jayawardena R, Misra A. Physical activity patterns among South-Asian adults: a systematic review. International Journal of Behavioral Nutrition and Physical Activity. 2013; 10(1):116. <https://doi.org/10.1186/1479-5868-10-116> PMID: 24119682
9. Indian Council of Medical Research-National Center for Disease Information and Reserach. National noncommunicable disease monitoring survey (NNMS) 2017–18, Bengaluru, India. 2020.
10. Department of Public Health MoH. Non-communicable disease Risk Factors: Bhutan STEPS Survey 2019, Thimpu. 2020.
11. Dhimal M, Bista B, Bhattarai S, Dixit L, Hyder M, Agrawal N, et al. Report of Non Communicable Disease Risk Factors: STEPS Survey Nepal 2019. Kathmandu, Nepal: Nepal Health Research Council (NHRC); 2020.
12. National Institute of Preventive and Social Medicine (NIPSOM). National STEPS Survey for Non-communicable Diseases Risk Factors in Bangladesh 2018.
13. Ministry of Health Nutrition and Indigenous Medicine. Non Communicable Disease Risk Factor Survey Sri Lanka 2015.
14. JS Consultancy Services. National Non-communicable Disease Risk Factors Survey.
15. Nepal Health Research Council. Non Communicable Diseases Risk Factors Survey, 2007/08. 2008.
16. Nepal Health Research Council. Non Communicable Diseases Risk Factors: STEPS Survey Nepal 2013. 2013.
17. Vaz M, Bharathi AV. How sedentary are people in "sedentary" occupations? The physical activity of teachers in urban South India. Occupational medicine. 2004; 54(6):369–72. <https://doi.org/10.1093/occmed/kqg100> PMID: 15347774.
18. Brito WF, Santos CL, Marcolongo Ado A, Campos MD, Bocalini DS, Antonio EL, et al. Physical activity levels in public school teachers. Revista de saude publica. 2012; 46(1):104–9. <https://doi.org/10.1590/s0034-89102012000100013> PMID: 22249754.
19. Simkhada P, Poobalan A, Simkhada PP, Amalraj R, Aucott L. Knowledge, attitude, and prevalence of overweight and obesity among civil servants in Nepal. Asia-Pacific journal of public health. 2011; 23(4):507–17. <https://doi.org/10.1177/1010539509348662> PMID: 19825841.
20. Abirami M, Raj Kala AJJoHS, Research. Health implications of school teachers—a review. 2018; 8(5):350–9.
21. Bogaert I, De Martelaer K, Deforche B, Clarys P, Zinzen E. Associations between different types of physical activity and teachers' perceived mental, physical, and work-related health. BMC public health. 2014; 14:534. <https://doi.org/10.1186/1471-2458-14-534> PMID: 24885620; PubMed Central PMCID: PMC4066273.
22. Cheung P. Teachers as role models for physical activity: Are preschool children more active when their teachers are active? European Physical Education Review. 2019; 26(1):101–10. <https://doi.org/10.1177/1356336X19835240>
23. Smuka I. Teacher Role Model and Students' Physical Activity. Polish Journal of Sport and Tourism. 2013; 19(4):281–6. <https://doi.org/10.2478/v10197-012-0027-9>
24. Cardinal BJ. Role Modeling Attitudes and Physical Activity and Fitness Promoting Behaviors of HPERD Professionals and Preprofessionals. Research quarterly for exercise and sport. 2001; 72(1):84–90. <https://doi.org/10.1080/02701367.2001.10608937> PMID: 11253325

25. Bashir S BM, Rana S,. Teacher as a Role Model and its Impact on the Life of Female Students. *Int J Res Granthaalayah*. 2022; 1(1):9–20. <https://doi.org/10.29121/granthaalayah.v1.i1.2014.3081>.
26. University of the People. Why Are Teachers Important In Our Society? They Have Influence. 2022.
27. Webster CA, Webster L, Russ L, Molina S, Lee H, Cribbs J. A Systematic Review of Public Health-Aligned Recommendations for Preparing Physical Education Teacher Candidates. *Research quarterly for exercise and sport*. 2015; 86(1):30–9. <https://doi.org/10.1080/02701367.2014.980939> PMID: 25437905
28. Kaur M, Singh BJOuc. Teachers' well-being: an overlooked aspect of teacher development. 2019; 14(3):25–33.
29. Šunda M, Babic V, Andrijasevic M. Physical Activity of Teachers. *Turkish Journal of Kinesiology*. 2021; 7(2):53–8. <https://doi.org/10.31459/turkjin.872306>.
30. Government of Nepal. Multisectoral Action Plan for the Prevention and Control of Non Communicable Diseases (2014–2020). 2014.
31. Ministry of Education Science and Technology. Education in Figure. 2017.
32. Education International. Nepal Education Fact Sheet. 2023.
33. Center for Education and Human Resource. Flash I Report 2078 (2021/22). 2022.
34. Bikram D, Thapa Chhetri DB, Moriwaki R. Monitoring urban growth, land use and land cover using remote sensing and GIS techniques: a case study of Bhaktapur district, Nepal. *Engineering Science and Technology: An International Journal (ESTIJ)*. 2017; 7:32.
35. Vaidya AK, Pokharel PK, Nagesh S, Karki P, Kumar S, Majhi S. Association of obesity and physical activity in adult males of Dharan, Nepal. *Kathmandu University medical journal*. 2006; 4(2):192–7. PMID: 18603897.
36. The IPAQ Group. Guidelines for Data Processing and Analysis of International Physical Activity Questionnaire (IPAQ)-Short and Long Form. 2005.
37. Guthold R, Stevens GA, Riley LM, Bull FC. Worldwide trends in insufficient physical activity from 2001 to 2016: a pooled analysis of 358 population-based surveys with 1.9 million participants. *The Lancet Global health*. 2018; 6(10):e1077–e86. [https://doi.org/10.1016/S2214-109X\(18\)30357-7](https://doi.org/10.1016/S2214-109X(18)30357-7) PMID: 30193830.
38. Hallal PC, Andersen LB, Bull FC, Guthold R, Haskell W, Ekelund U. Global physical activity levels: surveillance progress, pitfalls, and prospects. *The Lancet*. 2012; 380(9838):247–57. Epub 2012/07/24. [https://doi.org/10.1016/S0140-6736\(12\)60646-1](https://doi.org/10.1016/S0140-6736(12)60646-1) PMID: 22818937.
39. Yaya S, Bishwajit G. Patterns of Physical Activity and Self-rated Health Among Adult Populations in South Asia. *Cent Asian J Glob Health*. 2020; 9(1):e347–e. <https://doi.org/10.5195/cajgh.2020.347> PMID: 33062399.
40. World Health Organization. Global Physical Activity Questionnaire (GPAQ) Analysis Guide.
41. Sember V, Meh K, Sorić M, Starc G, Rocha P, Jurak G. Validity and Reliability of International Physical Activity Questionnaires for Adults across EU Countries: Systematic Review and Meta Analysis. *International journal of environmental research and public health* [Internet]. 2020; 17(19). <https://doi.org/10.3390/ijerph17197161> PMID: 33007880
42. Dias DF, Loch MR, Gonzalez AD, Andrade SM, Mesas AE. Insufficient free-time physical activity and occupational factors in Brazilian public school teachers. *Revista de saude publica*. 2017; 51:68. <https://doi.org/10.1590/S1518-8787.2017051006217> PMID: 28746571; PubMed Central PMCID: PMC5510795.
43. Kadariya S, Aro AR. Barriers and facilitators to physical activity among urban residents with diabetes in Nepal. *PLoS One*. 2018; 13(6):e0199329. <https://doi.org/10.1371/journal.pone.0199329> PMID: 29953475; PubMed Central PMCID: PMC6023206.
44. Paudel S, Subedi N, McLachlan CS, Smith BJ, Kallestrup P, Neupane D. Active commuting and leisure-time physical activity among adults in western Nepal: a cross-sectional study. *BMJ open*. 2021; 11(8):e051846–e. <https://doi.org/10.1136/bmjopen-2021-051846> PMID: 34385256.
45. Booth ML, Owen N, Bauman A, Clavisi O, Leslie E. Social–Cognitive and Perceived Environment Influences Associated with Physical Activity in Older Australians. *Preventive medicine*. 2000; 31(1):15–22. <https://doi.org/10.1006/pmed.2000.0661> PMID: 10896840
46. Sallis JF, Hovell MF, Richard Hofstetter C, Faucher P, Elder JP, Blanchard J, et al. A multivariate study of determinants of vigorous exercise in a community sample. *Preventive medicine*. 1989; 18(1):20–34. [https://doi.org/10.1016/0091-7435\(89\)90051-0](https://doi.org/10.1016/0091-7435(89)90051-0).
47. Sallis JF, Johnson MF, Calfas KJ, Caparosa S, Nichols JF. Assessing Perceived Physical Environmental Variables that May Influence Physical Activity. *Research quarterly for exercise and sport*. 1997; 68(4):345–51. <https://doi.org/10.1080/02701367.1997.10608015> PMID: 9421846

48. Johnson-Kozlow M, Sallis JF, Gilpin EA, Rock CL, Pierce JP. Comparative validation of the IPAQ and the 7-Day PAR among women diagnosed with breast cancer. *International Journal of Behavioral Nutrition and Physical Activity*. 2006; 3(1):7. <https://doi.org/10.1186/1479-5868-3-7> PMID: 16579852
49. Roberts-Lewis SF, White CM, Ashworth M, Rose MR. The validity of the International Physical Activity Questionnaire (IPAQ) for adults with progressive muscle diseases. *Disability and Rehabilitation*. 2021:1–9. <https://doi.org/10.1080/09638288.2021.1983042> PMID: 34606392
